# Supplementary material
Source: Royal Society of Chemistry journal article supplement (doi:10.1039/d6ta02451c)
Supplement: d6ta02451c1.pdf [file d6ta02451c1.pdf]

## Supporting Information

### Regulating solvation structure and interfacial chemistry via multifunctional acetylurea for highly reversible neutral zinc-manganese flow batteries

Zhengkun Deng,<sup>a</sup> Zhongyi He,<sup>\*a</sup> Lei Guo,<sup>\*b</sup> Wei Shi,<sup>b</sup> Yan Tan,<sup>b</sup> Zhongnian Zhao,<sup>b</sup> Liping Xiong,<sup>a</sup> Lili Li<sup>a</sup> and Fengshan Yu<sup>c</sup>

<sup>a</sup>School of Materials Science and Engineering, East China Jiaotong University, Nanchang 330013, China

E-mail: zhyhe@ecjtu.edu.cn

<sup>b</sup>School of Material and Chemical Engineering, Tongren University, Tongren 554300, China

E-mail: chygl@gztrc.edu.cn

<sup>c</sup>School of Energy Materials and Chemical Engineering, Hefei University, Hefei 230601, China

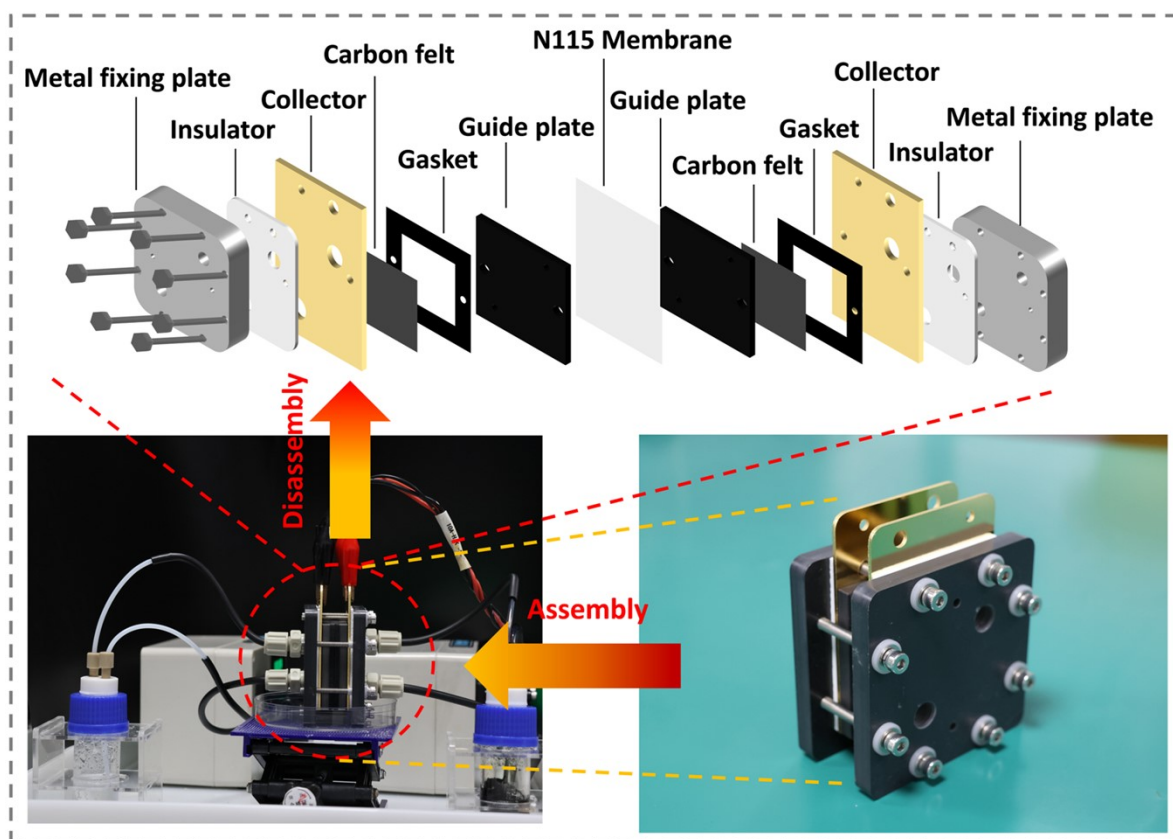

Fig. S1 Illustration of the disassembly and assembly of a typical ZMFB.

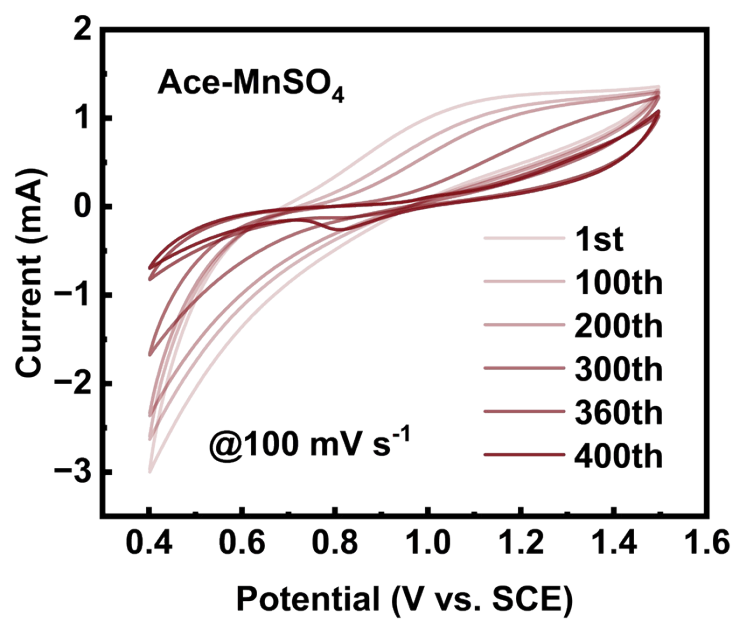

Fig. S2 Long-term stability of Ace over 400 cycles.

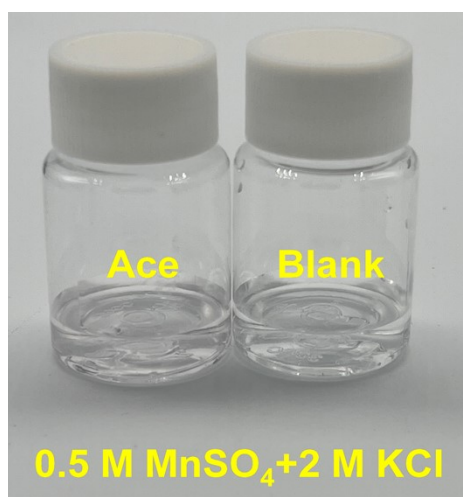

Fig. S3 Optical images of electrolyte solutions with and without Ace.

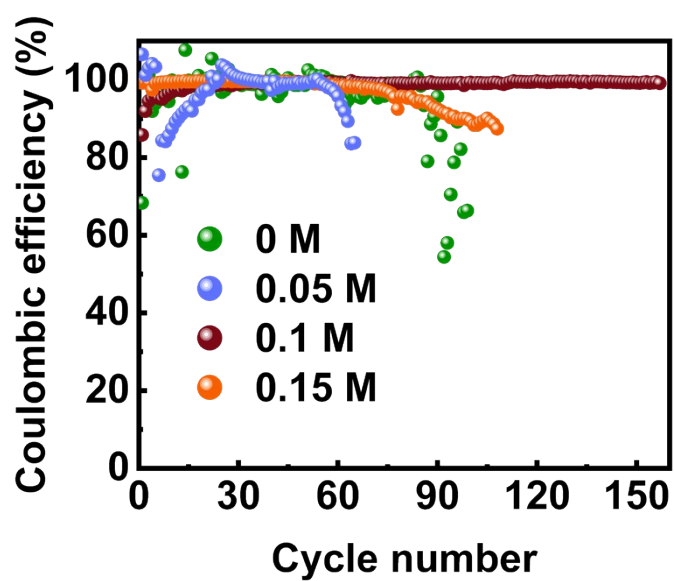

Fig. S4 The influence of different concentrations of Ace on cycling performance.

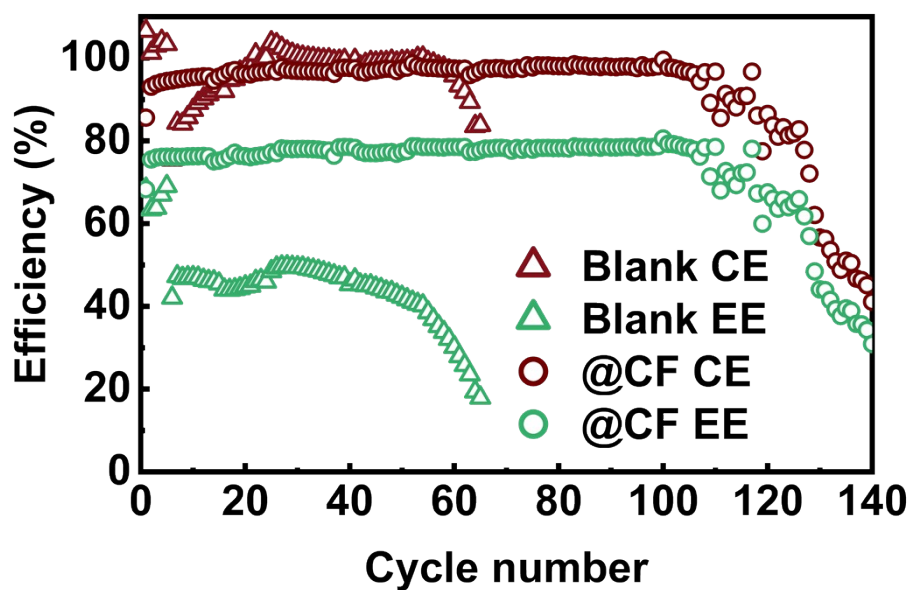

Fig. S5 Effect of Ace-pretreated carbon felt on cycling performance.

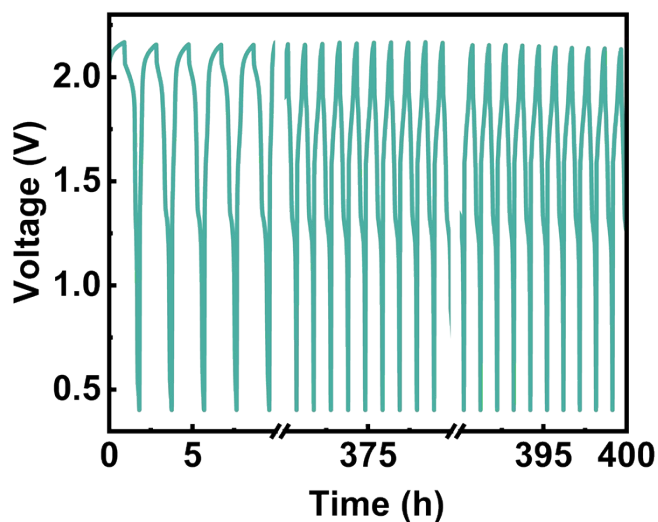

Fig. S6 Long-term cycling stability of the Ace-based ZMFB at 20 mA cm<sup>-2</sup>.

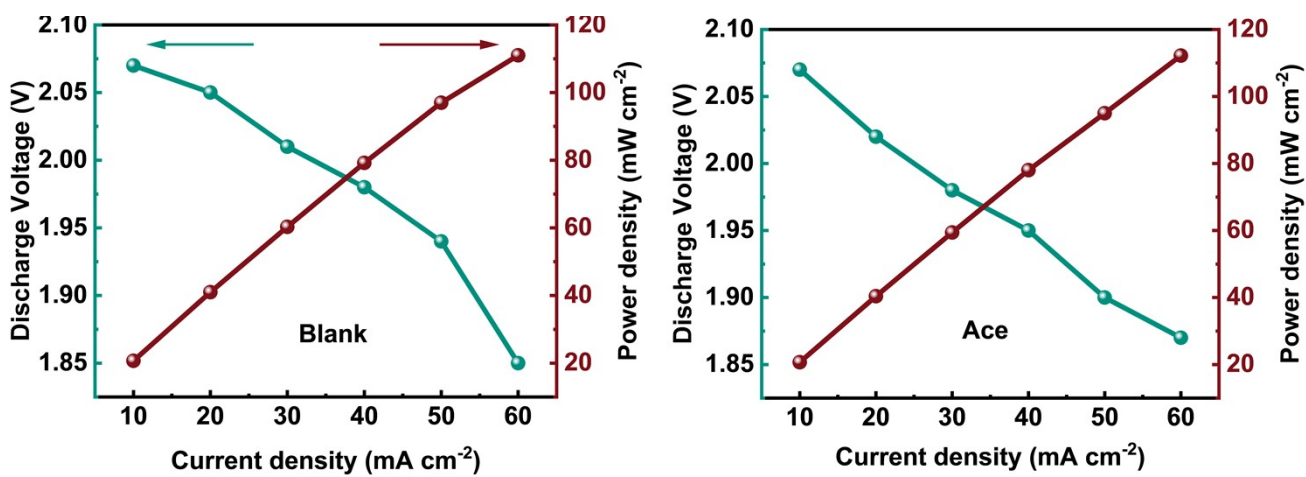

Fig. S7 Power density plots of the ZMFB systems with and without the Ace additive.

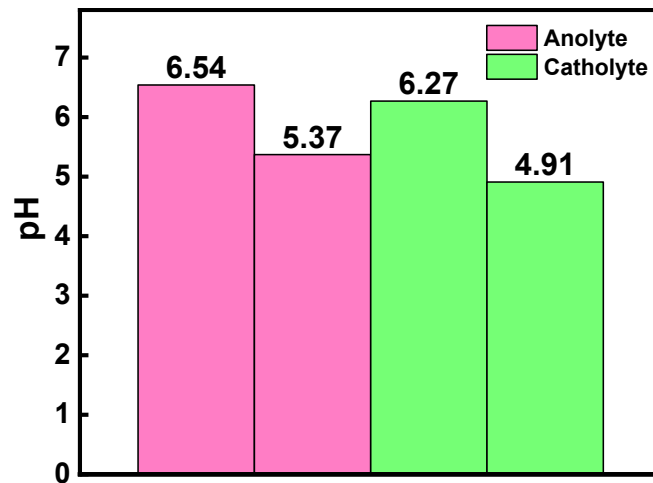

Fig. S8 pH variation of the electrolyte before and after circulation.

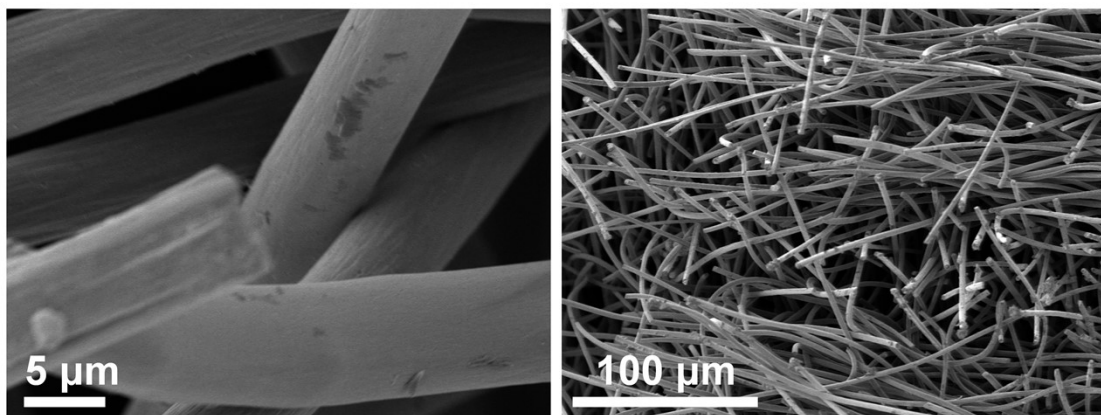

Fig. S9 SEM image of pristine carbon felt.

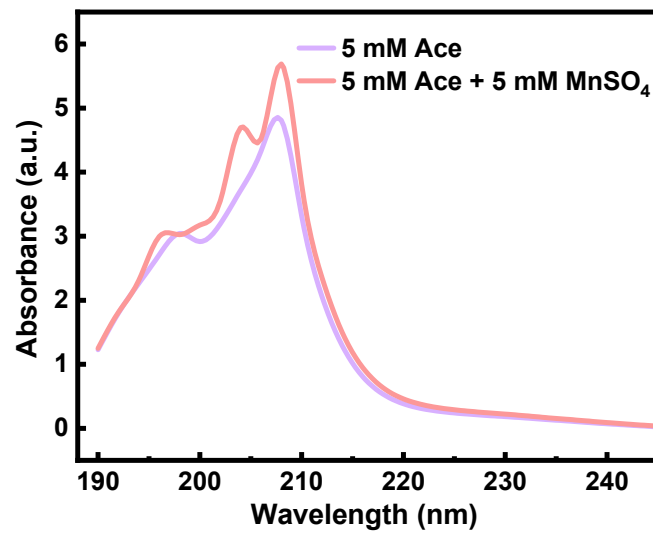

Fig. S10 UV-vis absorption spectra of Ace and MnSO<sub>4</sub> aqueous solutions.

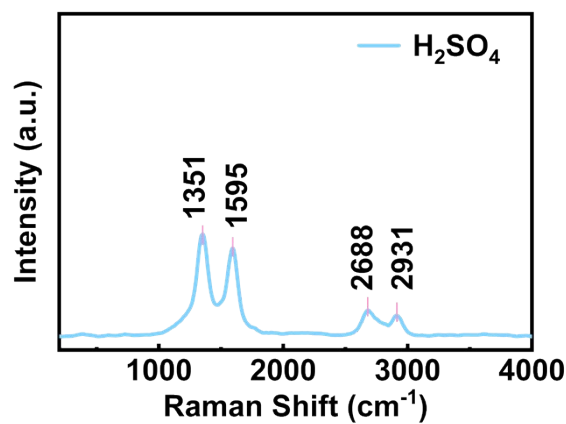

spectra of Ace and solutions.

Fig. S11 Raman spectrum of carbon felt treated only with H<sub>2</sub>SO<sub>4</sub>.

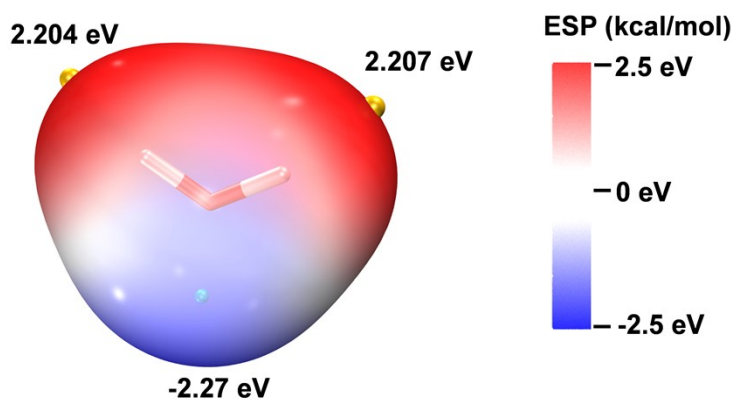

Fig. S12 Electrostatic potential map of a water molecule.

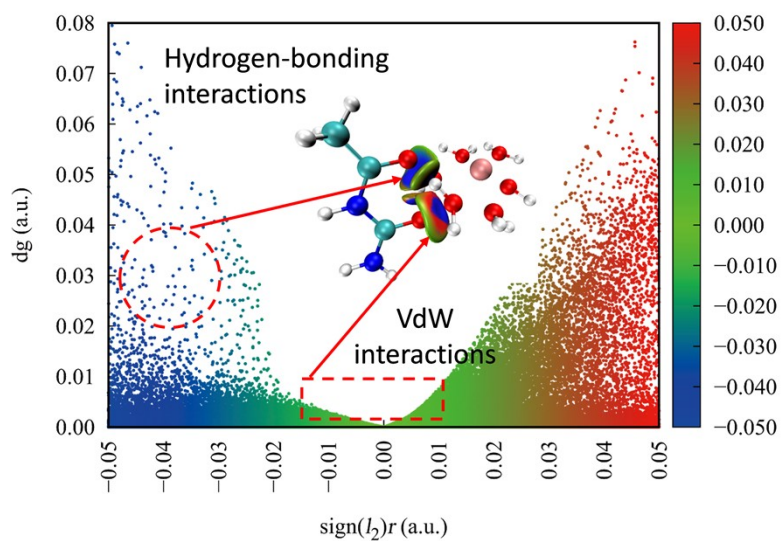

Fig. S13 IGMH analysis of Ace and the solvation structure of manganese ions.

Table S1 Comparison of different ZMFBs in this work and previous reports.

| Systems | Areal capacity (mAh cm <sup>-2</sup> ) | Current density (mA cm <sup>-2</sup> ) | Coulombic efficiency (%) | Cycle number | Accumulated Capacity (mAh) | Refs. |
|---------|----------------------------------------|----------------------------------------|--------------------------|--------------|----------------------------|-------|
|         |                                        |                                        |                          |              |                            |       |

|                                                                                                                                                                                              |     |    |      |     |        |                                                           |
|----------------------------------------------------------------------------------------------------------------------------------------------------------------------------------------------|-----|----|------|-----|--------|-----------------------------------------------------------|
| 0.5 M MnSO <sub>4</sub> + 2 M KCl + 0.1 M Ace;<br>0.5 M Zn(Ac) <sub>2</sub> + 2 M KCl                                                                                                        | 20  | 40 | 95.7 | 70  | 1339.8 | This work                                                 |
|                                                                                                                                                                                              | 10  | 20 | 99.1 | 380 | 3765.8 |                                                           |
| 0.5 M Mn(Ac) <sub>2</sub> + 0.5 M ZnCl <sub>2</sub> + 2 M KCl                                                                                                                                | 10  | 40 | 96.3 | /   | /      | [1]                                                       |
| 1.5 M Mn(Ac) <sub>2</sub> + 1.5 M ZnCl <sub>2</sub> + 3 M KCl                                                                                                                                | 20  | 40 | 95   | 30  | 570.0  | <i>Energy &amp; Environmental Science</i>                 |
| 1 M H <sub>2</sub> SO <sub>4</sub> + 1 M MnSO <sub>4</sub> + 1 M Na <sub>2</sub> SO <sub>4</sub> + 50 mM VO <sub>2</sub> SO <sub>4</sub> ;<br>0.5 M Zn(Ac) <sub>2</sub> + 2 M NaAc + 2 M HAc | 10  | 20 | 98.3 | 90  | 884.7  | [2]<br><i>ACS Sustainable Chemistry &amp; Engineering</i> |
|                                                                                                                                                                                              | 20  | 20 | 99.0 | 60  | 1188.0 |                                                           |
| 4 M ZnCl <sub>2</sub> + 4 M MnCl <sub>2</sub> + 1 M KCl + 1 M Gly                                                                                                                            | 10  | 20 | 91.1 | 20  | 182.2  | [3]<br><i>Chemical Engineering Journal</i>                |
| 0.5 M EDTA-Mn + 3 M NaCl;<br>0.5 M ZnCl <sub>2</sub> + 3 M NaCl                                                                                                                              | /   | 20 | 98   | 300 | /      | [4]<br><i>Journal of Power Sources</i>                    |
| 1 M EDTA-Mn                                                                                                                                                                                  | 3.3 | 20 | 95   | 100 | 313.5  |                                                           |
| 0.5 M ZnCl <sub>2</sub> + 0.5 M Mn(Ac) <sub>2</sub> + 2 M KCl + 1.75 M HAc                                                                                                                   | 2   | 50 | 95   | /   | /      | [5]<br><i>Energy Storage Materials</i>                    |
| 0.5 M Mn(Ac) <sub>2</sub> + 0.5 M Zn(Ac) <sub>2</sub> + 2 M KCl                                                                                                                              | 15  | 40 | /    | 180 | 2766.7 | [6]<br><i>Small</i>                                       |

**Table S2** Calculated formation energies for the various models.

| Model                                                    | E <sub>f</sub> (eV) |
|----------------------------------------------------------|---------------------|
| [Mn(H <sub>2</sub> O) <sub>6</sub> ] <sup>2+</sup>       | -14.50              |
| <b>Ace-[Mn(H<sub>2</sub>O)<sub>5</sub>]<sup>2+</sup></b> | <b>-16.33</b>       |
| 2Ace-[Mn(H <sub>2</sub> O) <sub>4</sub> ] <sup>2+</sup>  | -9.30               |
| 3Ace-[Mn(H <sub>2</sub> O) <sub>3</sub> ] <sup>2+</sup>  | -3.76               |
| 4Ace-[Mn(H <sub>2</sub> O) <sub>2</sub> ] <sup>2+</sup>  | Non-convergence     |
| 5Ace-[Mn(H <sub>2</sub> O) <sub>1</sub> ] <sup>2+</sup>  | Non-convergence     |
| 6Ace-Mn <sup>2+</sup>                                    | Non-convergence     |

## Cost calculation

The preliminary cost assessment focuses on the electrolyte compositions of both electrodes. The catholyte comprises an aqueous solution of 0.5 M MnSO<sub>4</sub>·H<sub>2</sub>O and 2 M KCl, with 0.1 M Ace evaluated as an additive. The anolyte consists of 0.5 M Zn(Ac)<sub>2</sub> and 2 M KCl. The unit prices of all individual electrolyte components are detailed in Table S3.

**Table S3** Estimated cost of the electrolyte solution.

| Chemical                            | Price [US\$ g <sup>-1</sup> ]* | Molar mass (g mol <sup>-1</sup> ) |
|-------------------------------------|--------------------------------|-----------------------------------|
| MnSO <sub>4</sub> ·H <sub>2</sub> O | 0.00056                        | 169.02                            |
| Zn(Ac) <sub>2</sub>                 | 0.00030                        | 183.48                            |

|     |         |        |
|-----|---------|--------|
| KCl | 0.00026 | 74.55  |
| Ace | 0.00025 | 102.09 |

\* Prices quoted from Sigma-Aldrich Corporation.

The overall chemical cost for both the anolyte and catholyte is derived from the summation of their individual constituent prices.

Cost of (catholyte) =  $[5.6 \times 10^{-4} \times 169.02 \text{ g mol}^{-1} \times 0.5 \text{ mol L}^{-1} + 2.6 \times 10^{-4} \times 74.55 \text{ g mol}^{-1} \times 2 \text{ mol L}^{-1} + 2.5 \times 10^{-4} \times 102.09 \text{ g mol}^{-1} \times 0.1 \text{ mol L}^{-1}] = 0.0886 \text{ \$}$

Cost of (anolyte) =  $[3.0 \times 10^{-4} \times 183.48 \text{ g mol}^{-1} \times 0.5 \text{ mol L}^{-1} + 2.6 \times 10^{-4} \times 74.55 \text{ g mol}^{-1} \times 2 \text{ mol L}^{-1}] = 0.0663 \text{ \$}$

$$C_e = 0.0886 \text{ \$} + 0.0663 \text{ \$} = 0.1549 \text{ \$}$$

The battery system employs a Nafion 115 membrane with a unit price of 500  $\text{\$/m}^2$ . The effective membrane area was approximately the same as that of the electrode frame, with dimensions of 3 cm  $\times$  3 cm, corresponding to 0.0009  $\text{m}^2$ . Accordingly, the membrane cost for a single cell was estimated to be  $C_m = 0.0009 \text{ m}^2 \times 500 \text{ \$/m}^2 = 0.4500 \text{ \$}$

$$\text{The total cost } C_t = C_e + C_m = 0.1549 \text{ \$} + 0.4500 \text{ \$} = 0.6049 \text{ \$}$$

The single-cell capacity of the ZMFB in this study ( $C_s$ ) is 0.09 Ah. The total energy delivered by a single cell was calculated according to the following equation:

$$E_{st} = \text{OCV} \times C_s = 1.5 \times 0.09 = 0.135 \text{ Wh}$$

The total system cost ( $C_{st}$ ) was then calculated according to the following equation:

$$C_{st} = \frac{C_t}{E_{st}} = \frac{0.6049}{0.135} = 4.48 \text{ \$/Wh}$$

where  $C_e$ ,  $C_m$ ,  $E_{st}$ ,  $C_s$  denote the total electrolyte cost, membrane cost, single-cell energy, and single-cell capacity, respectively.

It should be noted that this simplified estimate excludes stack hardware, current collectors, flow-field plates, frames, gaskets, electrolyte tanks, pumps, tubing, power electronics, manufacturing, assembly, maintenance, and lifetime-dependent replacement costs. Therefore, a complete techno-economic analysis is required before assessing the practical system-level cost of this chemistry.

The coulombic efficiency (CE), voltage efficiency (VE), and energy efficiency (EE) were calculated using the following equations:

$$\text{CE} = \frac{C_{\text{discharge}}}{C_{\text{charge}}} \times 100\%$$

$$\text{VE} = \frac{V_{\text{discharge}}}{V_{\text{charge}}} \times 100\%$$

$$\text{EE} = \text{CE} \times \text{VE}$$

where  $C_{\text{discharge}}$  refers to the discharge capacity of the battery during cycling, while  $C_{\text{charge}}$  denotes the charging capacity. Additionally,  $V_{\text{discharge}}$  represents the discharge voltage of the battery, and  $V_{\text{charge}}$  signifies the charging voltage.

## Reference

[1] C. Xie, T. Li, C. Deng, Y. Song, H. Zhang, X. Li, Energy & Environ. Sci. 2020, 13, 135.

- [2] J. Cao, K. Yu, J. Zhang, B. Lu, J. Yu, S. Huang, F. Zhang, *ACS Sustainable Chem. & Eng.* 2024, 12, 6320.
- [3] Y. Liu, M. Nan, Z. Zhao, B. Shen, L. Qiao, H. Zhang, X. Ma, *Chem. Eng. J.* 2023, 465, 142602.
- [4] X. Yu, Y. Song, A. Tang, *J. of Power Sources* 2021, 507, 230295.
- [5] Z. Liu, Y. Yang, B. Lu, S. Liang, H. J. Fan, J. Zhou, *Energy Storage Mater.* 2022, 52, 104.
- [6] Y. Liu, C. Xie, X. Li, *Small* 2024, 20, 2402026.
